# Supplementary material for: Gene Expression and DNA Methylation Profiling Suggest Potential Biomarkers for Azacitidine Resistance in Myelodysplastic Syndrome
Source: MDPI journal article supplement (doi:10.3390/ijms25094723), 2024-04-26
Supplement: s1 [file s1]

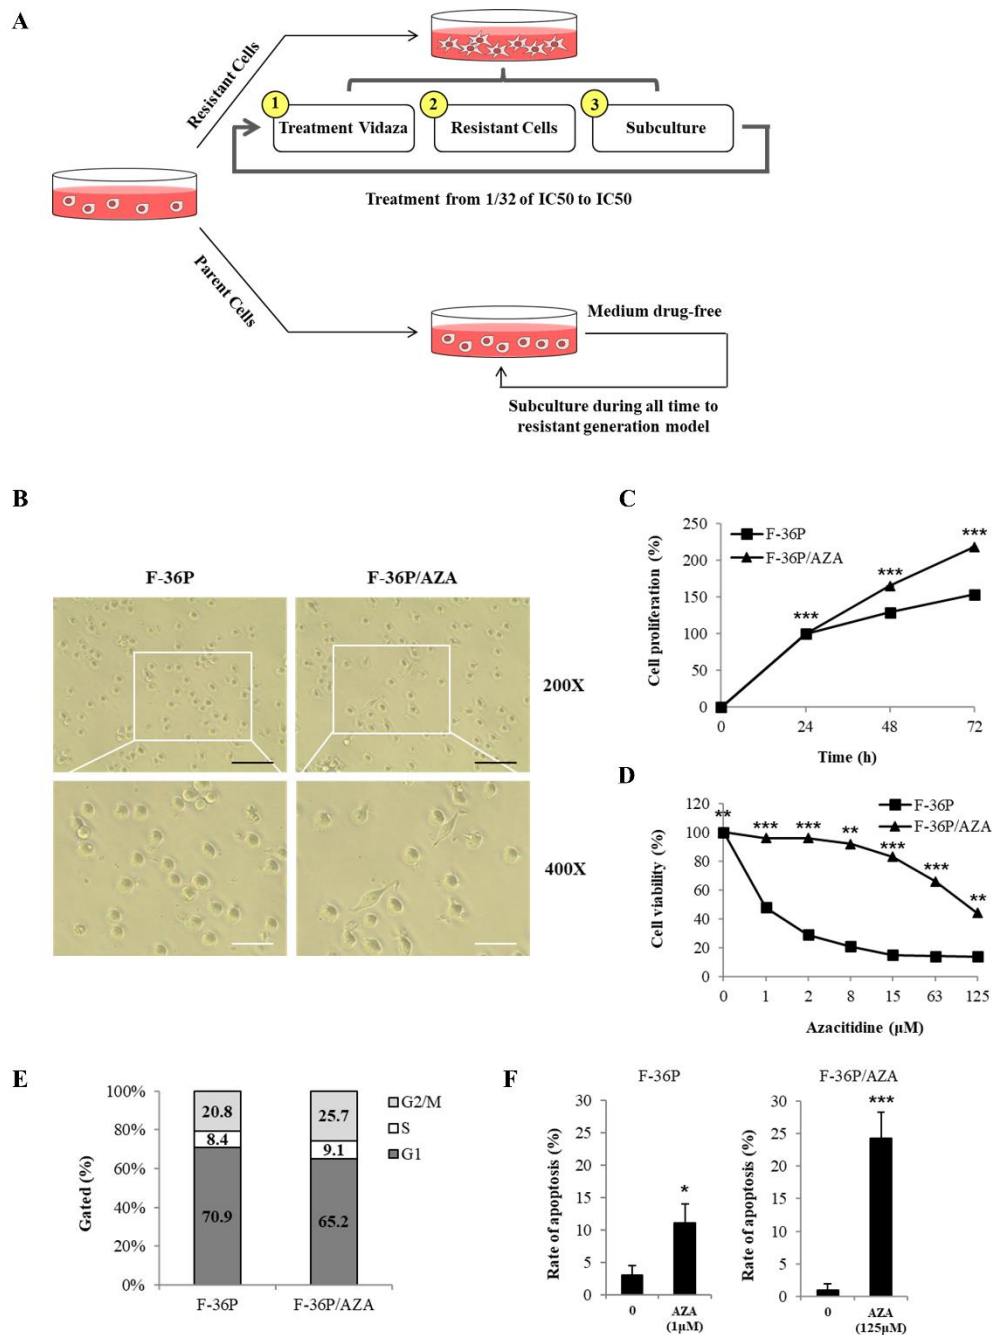

**Figure S1. Establishment of azacitidine resistant cell line.** (A) A scheme for preparation of azacitidine resistant cell line is shown. (B) Morphological observations of F-36P and F-36P/AZA are shown. Original magnification,  $\times 200$  (upper panels),  $\times 400$  (lower panels). Black scale bar represents 100  $\mu\text{m}$ ; white scale bar, 50  $\mu\text{m}$ . (C) The cell proliferation of F-36P and F-36P/AZA was determined using the WTS assay. (D) The cell viability of the AZA-treated F-36P and F-36P/AZA at 72h was assessed by the WTS assay. F-36P and F-36P/AZA cells were stained with PI and subjected to flow cytometry. Results showed (E) the cell cycle distribution and (F) the percentage of apoptotic cells after treatment of AZA. The IC<sub>50</sub> values of F-36P and F-36P/AZA to AZA were 1  $\mu\text{M}$  and 125  $\mu\text{M}$ , respectively. Data are presented as mean  $\pm$  SD (n = 3), \*\*p < 0.01, \*\*\*p < 0.001 vs. Control.



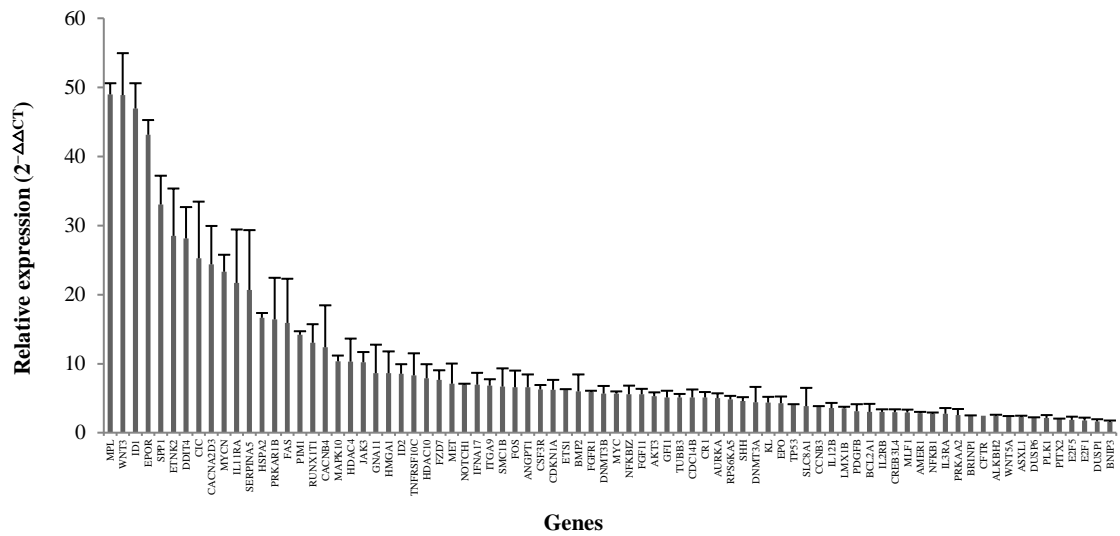

**Figure S3. Validation of candidate genes by RT-qPCR.** The graph depicts mRNA levels of candidate genes that are differentially expressed between F-36P and F-36P/AZA. All candidate genes were significantly upregulated in F-36P/AZA. The data were used GAPDH as the loading or internal control and analyzed by 2<sup>-ΔΔCT</sup> method. Differential expression is considered significant at p<0.05. Error bars indicate standard deviations (n = 3).

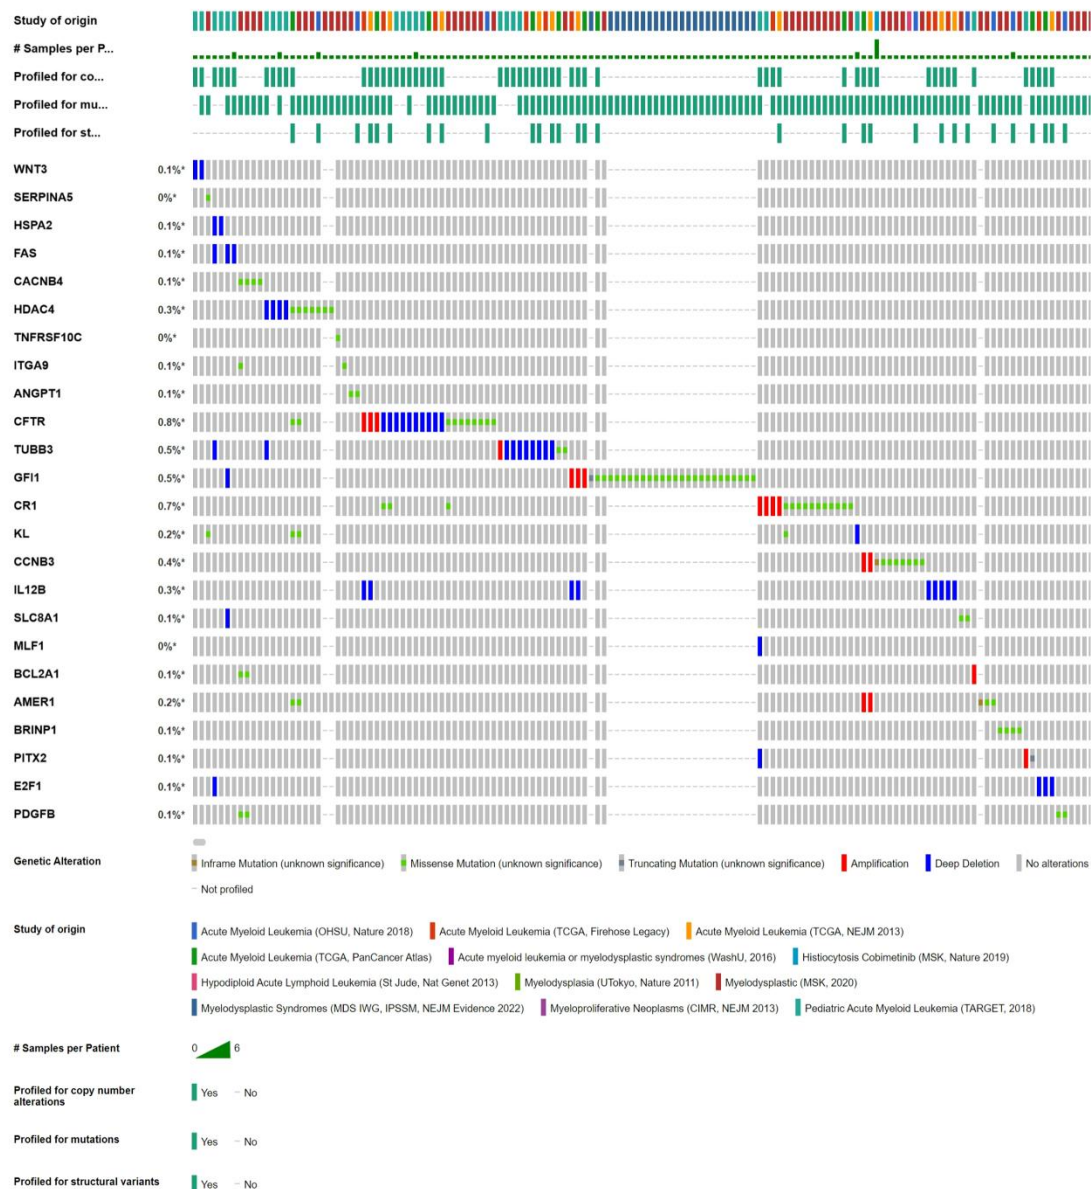

**Figure S4. Verification of candidate genes by cBioPortal analysis.** Candidate genes were queried for genetic alterations in MDS and AML datasets (<http://cbioportal.org/> accessed on 25 January 2023). Alterations were found in 0.1% to 0.8% of the respective analyses and are depicted graphically. Genetic alterations are color coded: Amplification, red; Missense mutations, green; Deep deletion, blue; No alterations, grey. \* Not all samples are profiled.

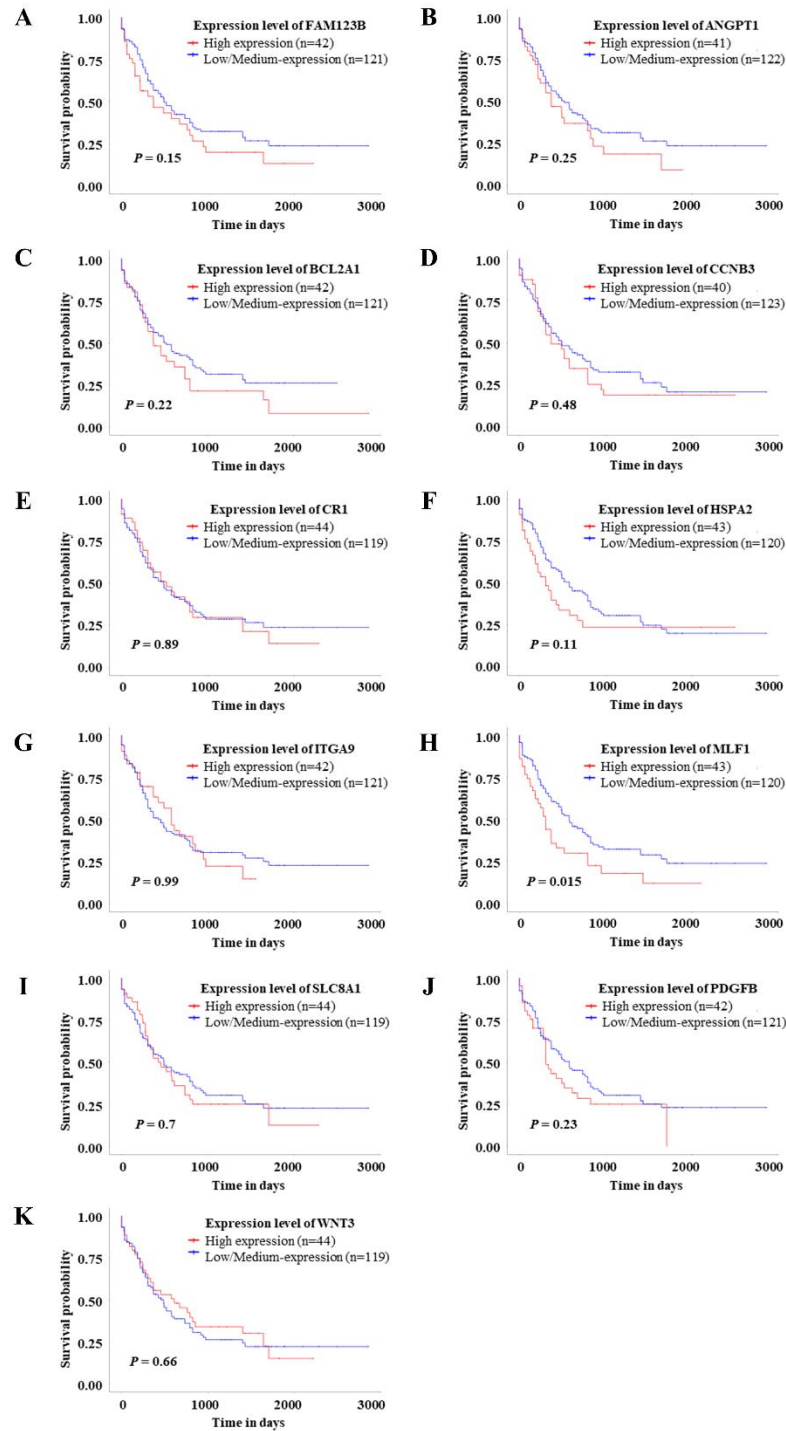

**Figure S5. Survival analysis of candidate gene expression in acute myeloid leukemia.** (A) FAM123B, (B) ANGPT1, (C) BCL2A1, (D) CCNB3, (E) CR1, (F) HSPA2, (G) ITGA9, (H) MLF1, (I) SLC8A1, (J) PDGFB, (K) WNT3. The results based on the UALCAN database indicated that higher gene expression was associated with poor prognosis in acute myeloid leukemia.

**Table S1.** Details of primers used for qRT-PCR analysis.

| Gene name |     | Primer Sequences     | Accession No.  | Product size |
|-----------|-----|----------------------|----------------|--------------|
| AKT3      | (F) | TCCAGGCTGTAGCAGACAGA | NM_181690      | 399          |
|           | (R) | AAAACAGCTCGCCCCCATT  |                |              |
| ALKBH2    | (F) | CATCCGGGATCACGTCTCTG | NM_001001655   | 295          |
|           | (R) | AAGACTGTGGTACCAGTGCG |                |              |
| AMER1     | (F) | CCCACACTTGGAAGCTCAT  | NM_152424      | 464          |
|           | (R) | CACAGTGGCATTCCCTTCCT |                |              |
| ANGPT1    | (F) | TTCAGAACCACACGGCTACC | NM_001146.3    | 406          |
|           | (R) | ATCAGCTCCAGTTGCTGCTT |                |              |
| ASXL1     | (F) | AGAAGAAGAAGGAGCGCACG | NM_001164603   | 238          |
|           | (R) | ACCTTGAGCGTGAAAAGGCT |                |              |
| AURKA     | (F) | AGGTGGATCTCTGGAGCCTT | NM_198433      | 232          |
|           | (R) | TTTGCTGTGATCCAGGGGTG |                |              |
| BCL2A1    | (F) | CTGCAGTGCGTCCTACAGAT | NM_004049      | 293          |
|           | (R) | GTATCCACATCCGGGGCAAT |                |              |
| BMP2      | (F) | ATGCAAGCAGGTGGGAAAGT | NM_001200.2    | 343          |
|           | (R) | ATCCAGTCATTCCACCCAC  |                |              |
| BNIP3     | (F) | CAGCATGAGTCTGGACGGAG | NM_004052      | 435          |
|           | (R) | TCAAAAGGTGCTGGTGGAGG |                |              |
| BRINP1    | (F) | TCCTGCAACAAGGGCTACA  | NM_014618      | 155          |
|           | (R) | TAGAGGCGTGAGTCCAT    |                |              |
| CACNA2D3  | (F) | ATACCGCTCTCCGTGGTGAA | NM_018398.2    | 322          |
|           | (R) | TCCCGTCTTTGTCCCTTCAT |                |              |
| CACNB4    | (F) | ACACAACCAGTAGCACACCC | NM_001005747.2 | 314          |
|           | (R) | TCCTCGGTTCTATGGGGTT  |                |              |
| CCNB3     | (F) | TACCACCCCAGAGCTCCAAA | NM_033671      | 230          |
|           | (R) | GGCTTCTTTCTTGGGCTGGA |                |              |
| CDC14B    | (F) | CGATCGCCTTTGTTTTGCCA | NM_003671      | 362          |
|           | (R) | TGCAACTTCCATAGGCAGCA |                |              |
| CDKN1A    | (F) | GCGACTGTGATGCGCTAATG | NM_000389      | 353          |
|           | (R) | ATCTGTCATGCTGGTCTGCC |                |              |
| CFTR      | (F) | AAAAGGCCAGCGTTGTCTCC | NM_000492      | 343          |
|           | (R) | ATCGCGATAGAGCGTTCCTC |                |              |
| CIC       | (F) | CTCTGTGGACAACAGGGTCC | NM_015125      | 419          |
|           | (R) | AGCCATGGTCCTGAAAGAGC |                |              |
| CR1       | (F) | CCCACATCCACCCAAGATCC | NM_000573      | 548          |
|           | (R) | TTGTTTGCAGAGTTCGGGGA |                |              |
| CREB3L4   | (F) | GCAGTGACAGTGGCATCTCT | NM_130898      | 444          |
|           | (R) | TGTCCTGAGCTGACTGCTTG |                |              |
| CSF3R     | (F) | GGCCTCAGGGCTATGTGATT | NM_156038.2    | 509          |
|           | (R) | TCTTCCTGCTGGGGTCAAG  |                |              |
| DDIT4     | (F) | ACTTCGAGCTGCTCAGTGAC | NM_019058      | 414          |
|           | (R) | TGATGACTCGGAAGCCAGTG |                |              |
| DNMT1     | (F) | ATGAGCAGCCCATCTTCCTG | BC126227       | 399          |
|           | (R) | CCTCATCGTCATCTGCCTCC |                |              |

|        |                                                       |              |     |
|--------|-------------------------------------------------------|--------------|-----|
| DNMT3A | (F) CCCAGGCAGCCATTAAGGAA<br>(R) GCGATCATCTCCCTCCTTGG  | AF331856.1   | 553 |
| DNMT3B | (F) GGCTGTTTGTCTTGTGGCAG<br>(R) GGAATGGCAGGGTACAGCTT  | AF176228     | 404 |
| DUSP1  | (F) AAAGGAGGATACGAAGCGTT<br>(R) ATAAGGTAAGCAAGGCAGAT  | NM_004417    | 500 |
| DUSP6  | (F) AAACAAGGCCCGATCGATGT<br>(R) GGTGGGGAAGGCTGATGAA   | NM_005225    | 350 |
| E2F1   | (F) CCAAGTTCGTGTCGCTGC<br>(R) GCCTGAATGGCCAAAAGTGT    | NM_001951    | 397 |
| E2F5   | (F) ACGACGGGCTGTGCTGAACA<br>(R) AGGCCGCATCTGGAGGGGA   | NM_000799.2  | 301 |
| EPO    | (F) GACCCCAAGTTCGAGAGCAA<br>(R) CCTCGTAGCGGATGTGAGAC  | NM_000121    | 451 |
| EPOR   | (F) ATACTATCCACGCCAACGGC<br>(R) CGGATCACTGCGTACCTGAG  | NM_018208    | 556 |
| ETNK2  | (F) TCCCCTCCCCGGGTAAACTC<br>(R) CCTTATTGAGGTCAGCACGGT | NM_001162422 | 231 |
| ETS1   | (F) TGCTGGGCATCTGGACCCTC<br>(R) TCTTGGCAGGGCACGCAGTC  | NM_000043    | 259 |
| FAS    | (F) CCTCATCCTGCTGTCCAAGG<br>(R) AGCGACACTCAGCTGTGAAA  | NM_004112    | 305 |
| FGF11  | (F) ACAAGGACAAACCAACCGT<br>(R) GCACTTCTTGGAGGCCAGAT   | NM_015850    | 356 |
| FGFR1  | (F) TACTACCACTACCCGCAGA<br>(R) CAGGTTGGCAATCTCGGTCT   | NM_005252    | 474 |
| FOS    | (F) CTACCCTACCGCGCCCTAC<br>(R) CATGAAGTAGCAGCCGACA    | NM_003507    | 361 |
| FZD7   | (F) GAACGGAGCTCGGAGTTTGA<br>(R) CCACCTTCTCTGGAAACCC   | NM_005263    | 988 |
| GFI1   | (F) AGTGCCATCAAGACCCTGTG<br>(R) TCTTCAGGATGAACTCCCGC  | NM_002067    | 547 |
| GNA11  | (F) TGTGTGTTCAACAACGTGGC<br>(R) CTGAGTCAAATCCTGCCGAGA | NM_032019    | 367 |
| HDAC10 | (F) AAATTCTAGGCTCGCTCGC<br>(R) TCCCAGTCCACGATGAGGAT   | NM_006037    | 311 |
| HDAC4  | (F) CAGGAAAAGGACGGCACTGA<br>(R) GTCTGCCCCTTGTTTCCTT   | NM_145904    | 214 |
| HMGA1  | (F) GAGCTCAATGCCGACCTCTT<br>(R) AGTACGCTGCTCTGGTTGTC  | NM_021979    | 407 |
| HSPA2  | (F) CTGGACGAGCAGCAGGTAAA<br>(R) TCAGCGACACAAGATGCGAT  | NM_002165    | 300 |
| ID1    | (F) TGAAAGCCTTCAGTCCCGTG<br>(R) TGGTGATGCAGGCTGACAAT  | NM_002166    | 271 |
| ID2    | (F) CCCAGGCAGCCATTAAGGAA<br>(R) GCGATCATCTCCCTCCTTGG  | AF331856.1   | 553 |
| IFNA17 | (F) TCCTGCCTGAAGGACAGACA                              | NM_021268    | 342 |

|         |     |                       |                |     |
|---------|-----|-----------------------|----------------|-----|
| IL11RA  | (R) | CCAGGCACAAGGGCTGTATT  | NM_147162      | 420 |
|         | (F) | ACCTACATCTGCCAGACCCT  |                |     |
|         | (R) | TGGTACTGACTCTACCCGCA  |                |     |
| IL12B   | (F) | AAGGGGTGACGTGCGGAGCT  | NM_002187      | 269 |
|         | (R) | GCTGACCTCCACCTGCCGAG  |                |     |
| IL2RB   | (F) | GTGGAGACCCACAGATGCAA  | NM_000878.2    | 300 |
|         | (R) | CGGAATGGTGTCTTCCCAA   |                |     |
| IL3RA   | (F) | ACGCCGACTATTCTATGCCG  | NM_002183      | 287 |
|         | (R) | CTCGTACTGTTGACGCCTGT  |                |     |
| ITGA9   | (F) | GACCGCGATGATGAGTGGAT  | NM_002207      | 436 |
|         | (R) | CATCAATGGTGGACGGGTGA  |                |     |
| JAK3    | (F) | CTGTCTGTGTCCAGAACCCC  | NM_000215      | 375 |
|         | (R) | AGCCCCGGTAAATCTTGGTG  |                |     |
| KL      | (F) | GTGGCCGAGAGAGTTTGGAA  | AB005142.1     | 359 |
|         | (R) | GGGAGGTCTCCGTACTTGAA  |                |     |
| LMX1B   | (F) | AGAGACACTGGCAGCTGA    | NM_002316      | 291 |
|         | (R) | TCGTTCCCTGGCATTGCGG   |                |     |
| MAPK10  | (F) | TTCACACCCCAGAAAACGCT  | NM_002753      | 522 |
|         | (R) | CTTGGGCCGATTCTCCACAT  |                |     |
| MET     | (F) | CGCACAAAGCAAGCCAGATT  | NM_000245      | 553 |
|         | (R) | GAGGCATTGACTGCAGGACT  |                |     |
| MLF1    | (F) | TCCATTCTTGACACCCGAGA  | NM_022443      | 351 |
|         | (R) | TGGAGCTCGACGAGTTTGAG  |                |     |
| MPL     | (F) | AGCTGCCTCATCTCAGGACT  | NM_005373.2    | 344 |
|         | (R) | AAGTGGCAGCGAGAGAACTG  |                |     |
| MYC     | (F) | TCGGTGCAGCCGTATTCTA   | AH002905       | 325 |
|         | (R) | TGATGAAGGTCTCGTCGTCC  |                |     |
| MYCN    | (F) | TTCGGTCCAGCTTTCTCACG  | NM_005378.4    | 202 |
|         | (R) | CAAGTCCGAGCGTGTTCAAT  |                |     |
| NFKB1   | (F) | GGGCACTGGAAGTACAGGTC  | NM_003998.2    | 435 |
|         | (R) | TCCTGCACAGCAGTGAGATG  |                |     |
| NFKBIZ  | (F) | TCGTTGTCTGATGGACCTGC  | NM_001005474   | 466 |
|         | (R) | TTGGTTCATAAGCGGGGGAC  |                |     |
| NOTCH1  | (F) | TGCACACTATTCTGCCCCAG  | NM_017617      | 309 |
|         | (R) | ACTTGAAGGCCTCCGGAATG  |                |     |
| PDGFB   | (F) | ATGATCGCCGAGTGCAAGAC  | NM_002608.4    | 411 |
|         | (R) | CGTGTGCTTGAATTTCCGGT  |                |     |
| PIM1    | (F) | TTCATCACGAAAGGGGAGC   | NM_002648      | 361 |
|         | (R) | GGCCCCCTGATGATCTCTCG  |                |     |
| PITX2   | (F) | TCGGCGTGTGTGCAATTAGAG | NM_153427.2    | 376 |
|         | (R) | CGGCCAGTTGTTGTAGGAA   |                |     |
| PLK1    | (F) | TGACTCAACACGCCTCATCC  | NM_005030      | 390 |
|         | (R) | AGGAGACTCAGGCGGTATGT  |                |     |
| PRKAA2  | (F) | TCTTCTTTGTGGCACCCCTCC | NM_006252      | 355 |
|         | (R) | ATAAGCCACTGCAAGCTGGT  |                |     |
| PRKAR1B | (F) | AAGCCAAGACGGACCTCAAG  | NM_001164759.1 | 292 |
|         | (R) | ACGTACTCCTCATTTGGGGGA |                |     |



|           |     |                        |                |     |
|-----------|-----|------------------------|----------------|-----|
| RPS6KA5   | (F) | CAGCTCCTCACTGTCAAGCA   | NM_004755      | 425 |
|           | (R) | AGGGCAAGCACAATCTCTCC   |                |     |
| RUNX1T1   | (F) | TGCAGCAGTTTGGCAATGAC   | NM_004349      | 348 |
|           | (R) | TGGTTCTGTCTGGAGTTCGC   |                |     |
| SERPINA5  | (F) | AATGCCCTTTTCACCGACCT   | NM_000624      | 482 |
|           | (R) | AGCCACTTCCTCAGCGTTTT   |                |     |
| SHH       | (F) | TCCACTGCTCGGTGAAAGCAG  | NM_000193      | 674 |
|           | (R) | AGCTGTGCTCCTCGATGACC   |                |     |
| SLC8A1    | (F) | GCAAGCAGAGGGGGATGATT   | NM_001112800.1 | 503 |
|           | (R) | GGTAAGGGCCACAGTACCAC   |                |     |
| SMC1B     | (F) | AGTTTTCTGTCCTGCCCCATT  | NM_148674.3    | 273 |
|           | (R) | TCCGTGTCTCTTGCTGCTTT   |                |     |
| SPP1      | (F) | GAATCTCCTAGCCCCACAGACC | NM_000582      | 378 |
|           | (R) | TGTGAGGTGATGTCCTCGTCT  |                |     |
| TNFRSF10C | (F) | ACAGAGGCACAGCTTCAAGG   | NM_003841.2    | 355 |
|           | (R) | GGTTTCCACAGTGGCATTGG   |                |     |
| TP53      | (F) | TGGGACAGCCAAGTCTGTGA   | AB082923       | 436 |
|           | (R) | ACTGGAGTCTTCCAGTGTGA   |                |     |
| TUBB3     | (F) | TCACTACACGGAGGGGGCGG   | NM_006086.3    | 418 |
|           | (R) | CGGGAAGCGCAAGGAGGTGG   |                |     |
| WNT3      | (F) | AACAAGCACAACAACGAGGC   | NM_030753      | 427 |
|           | (R) | TTTCCTTCCGCTTCTCCGTC   |                |     |
| WNT5A     | (F) | CTTTGGGGATGGCTGGAAGT   | NM_003392      | 352 |
|           | (R) | ATCTGCATCACCCCTGCCAAA  |                |     |
| GAPDH     | (F) | AAGGACTCATGACCACAGTC   | NM_001289745.2 | 160 |
|           | (R) | TTCAGCTCAGGGATGACCTT   |                |     |

**Table S2.** Details of primers used for pyrosequencing.

| Gene name |     | Primer Sequences                   | Position            | Accession No. | Product size |
|-----------|-----|------------------------------------|---------------------|---------------|--------------|
| AMER1     | (F) | GTTTTTTTGGGGTTTAGAGAGAGTTGG        | 17171-17417         | NG021345.1    | 247          |
|           | (R) | CCTCAAACCTCCAAACACTATTATAACA<br>TT |                     |               |              |
| ANGPT1    | (F) | GTTTAAGGTAATTGTTTGTGGAAAG          | 4883-5073           | NG_029405.1   | 191          |
|           | (R) | TACACATCCAAACCAAACTAAAAAC          |                     |               |              |
| BCL2A1    | (F) | GATGGGGTTTATTGTGTTAGTTAG           | 3678-3804           | NG_029487.1   | 127          |
|           | (R) | AAAATACCTCTTTAAACCAAAACAC          |                     |               |              |
| CACNB4    | (F) | TAGTTTTTTGTTGGGTAGGATGTTT          | 129991-130180       | NG_012641.1   | 190          |
|           | (R) | TCCAAACCTAACATTTTATCTACCTTC        |                     |               |              |
| CCNB3     | (F) | TTGGATTATAGTTTTTTTGGATTGAA         | 3379-3667           | NG_012880.1   | 289          |
|           | (R) | CACAATACCTACCATCCTCTATAAAC         |                     |               |              |
| CFTR      | (F) | AGGAGGAGGAGGAAGGTAGG               | 18707-18909         | NG_016465.4   | 203          |
|           | (R) | CCCAACACCAAACCCATCC                |                     |               |              |
| CR1       | (F) | GGGAAGTTGTGGTAAAAAGTA              | 4980-5142           | NG_007481.1   | 163          |
|           | (R) | ATTCTCCCAAACACATCTA                |                     |               |              |
| DBC1      | (F) | TGGGGGTATTTGGTTTTTAGTAGT           | 139562-139837       | AL138894.1    | 276          |
|           | (R) | CACTTAAACTTCCCTCTCCATT             |                     |               |              |
| E2F1      | (F) | TGGGTTTTTATTATGTTGATTAGGTT         | 4118-4326           | NG_046988.1   | 209          |
|           | (R) | ACTTACTCTATACCCATCCTCAATT          |                     |               |              |
| FAS       | (F) | TGAATTAATGGAGTTTTTTTAAATT          | 5026-5154           | NG_009089.2   | 129          |
|           | (R) | TCTTTAAACACCTATATCACTCTTAC         |                     |               |              |
| GFI1      | (F) | TGTTGTGGAAATATTTGGGGATAA           | 62924153 - 62924273 | NM_005263.2   | 121          |
|           | (R) | CCACCTCTTCCAAATTTAACCAT            |                     |               |              |
| HDAC4     | (F) | ATTTGTGGGTATTTGGTTTATGAG           | 53066-53244         | NG_009235.1   | 179          |
|           | (R) | ACAATATCCACTCCTTTAAATAATTC         |                     |               |              |
| HSPA2     | (F) | GGAAAATTAGGGAGATGAATTT             | 139063-139201       | AL049869.6    | 139          |
|           | (R) | ATTAAATCTAAAAATTCCCAAAAAC          |                     |               |              |
| IL12B     | (F) | TAGATTTTTTGGGTTTTATA               | 3567357-3567524     | NM_002187.2   | 168          |
|           | (R) | TACTAAACCCCTTACCCTTC               |                     |               |              |
| ITGA9     | (F) | ATTTAGTAGGGTTGAGTGGGATTT           | 4205-4447           | NG_016166.1   | 243          |
|           | (R) | TCCTCTACTCCTTCACCCAATTATA          |                     |               |              |
| Klotho    | (F) | AGTGAGAGTAGGTGTTTTTTTAG            | 4545-4700           | NG_011485.1   | 156          |
|           | (R) | CAAATTCATTCTCTTACCTACC             |                     |               |              |
| MLF1      | (F) | GGATATTGGGTGTTATTTGGTTTAA          | 4679-4785           | NG_027720.1   | 107          |
|           | (R) | CCCTTTCTATAACCTTAAACATACC          |                     |               |              |
| NCX1      | (F) | TGTTATATGAGTTAATTTAAATGGA          | 14033-14228         | AC007281.3    | 196          |
|           | (R) | AATAAACAAACCAAAACCTAATTAT          |                     |               |              |
| PDGFB     | (F) | TATTTAGGGAATGAAAAATGGG             | 4903-5092           | NG_012111.1   | 190          |
|           | (R) | AAAACATCTCCACCCACCTCT              |                     |               |              |
| PITX2     | (F) | TGGAAGAGAAGAAAAAGTAA               | 4783-4967           | NG_007120.1   | 185          |
|           | (R) | TCCCAAACAACCCATAAAC                |                     |               |              |
| SERPINA5  | (F) | TGGTTTAGTTGGTGGTGTA                | 24779-24907         | NG_032908.2   | 129          |
|           | (R) | AACAACCCCTTCCTTTCCTA               |                     |               |              |
| TNFRSF10C | (F) | TGTTTGGAAGTGATTGTTGTAAGTG          | 5023-5211           | NG_032578.1   | 189          |
|           | (R) | AAACCTCCTTCACCCCTTACATCTCT         |                     |               |              |

|       |     |                          |           |                 |     |
|-------|-----|--------------------------|-----------|-----------------|-----|
| TUBB3 | (F) | GGTTTTGTTTGGTTTGTG       | 5560-5695 | NG_027810<br>.1 | 136 |
|       | (R) | TCCTCCACCAAAAACTACCAT    |           |                 |     |
| WNT3  | (F) | TGATTTTGTATAAAAGATTAAATG | 4345-4583 | NG_008084<br>.2 | 239 |
|       | (R) | AAAATATTTCCAAAAACCCC     |           |                 |     |

---

**Table S3.** GO analysis of AZA resistance-related DEGs.

| Category | Term       | Description                                                            | Count | P-Value   |
|----------|------------|------------------------------------------------------------------------|-------|-----------|
| BP       | GO:0043066 | Negative regulation of apoptotic process                               | 17    | 2.92.E-10 |
|          | GO:0000122 | Negative regulation of transcription from RNA polymerase II promoter   | 20    | 6.39E-10  |
|          | GO:0045944 | Positive regulation of transcription from RNA polymerase II promoter   | 20    | 9.64E-08  |
|          | GO:0000165 | MAPK cascade                                                           | 9     | 3.16.E-05 |
|          | GO:0007050 | Cell cycle arrest                                                      | 7     | 5.29.E-05 |
|          | GO:0042493 | Response to drug                                                       | 8     | 5.66.E-04 |
|          | GO:0006355 | Regulation of transcription, DNA-templated                             | 15    | 9.90.E-03 |
|          | GO:0016055 | Wnt signaling pathway                                                  | 5     | 1.17.E-02 |
|          | GO:0030097 | Hemopoiesis                                                            | 3     | 3.15.E-02 |
|          | GO:0050671 | Positive regulation of lymphocyte proliferation                        | 2     | 3.25.E-02 |
| CC       | GO:0005654 | Nucleoplasm                                                            | 29    | 7.87.E-06 |
|          | GO:0009986 | Cell surface                                                           | 12    | 2.11.E-05 |
|          | GO:0005576 | Extracellular region                                                   | 18    | 4.50.E-04 |
|          | GO:0005634 | Nucleus                                                                | 38    | 9.60.E-04 |
|          | GO:0043234 | Protein complex                                                        | 8     | 2.05.E-03 |
|          | GO:0005829 | Cytosol                                                                | 25    | 5.78.E-03 |
|          | GO:0005886 | Plasma membrane                                                        | 28    | 1.25.E-02 |
|          | GO:0005615 | Extracellular space                                                    | 12    | 3.03.E-02 |
|          | GO:0005887 | Integral component of plasma membrane                                  | 12    | 4.12.E-02 |
|          | GO:0005737 | Cytoplasm                                                              | 31    | 4.61.E-02 |
| MF       | GO:0008134 | Transcription factor binding                                           | 12    | 8.26.E-08 |
|          | GO:0004896 | Cytokine receptor activity                                             | 6     | 6.64.E-07 |
|          | GO:0003700 | Transcription factor activity, sequence-specific DNA binding           | 16    | 3.35.E-05 |
|          | GO:0046982 | Protein heterodimerization activity                                    | 9     | 1.47.E-03 |
|          | GO:0042802 | Identical protein binding                                              | 11    | 2.52.E-03 |
|          | GO:0044212 | Transcription regulatory region DNA binding                            | 6     | 3.23.E-03 |
|          | GO:0051718 | DNA (cytosine-5-)-methyltransferase activity, acting on CpG substrates | 2     | 9.34.E-03 |
|          | GO:0004888 | Transmembrane signaling receptor activity                              | 5     | 1.80.E-02 |
|          | GO:0019899 | Enzyme binding                                                         | 6     | 1.99.E-02 |
|          | GO:0019901 | Protein kinase binding                                                 | 6     | 3.15.E-02 |

**Table S4.** The 23 most differentially expressed genes from the volcano plot.

| No. | Gene Name | Log <sub>2</sub><br>fold change | P-value | Description                                                                       |
|-----|-----------|---------------------------------|---------|-----------------------------------------------------------------------------------|
| 1   | MPL       | 3.86                            | 0.002   | MPL proto-oncogene, thrombopoietin receptor                                       |
| 2   | RIN1      | 2.80                            | 0.048   | Ras interaction/interference protein 1                                            |
| 3   | CCNB3     | 2.44                            | 0.033   | G2/mitotic-specific cyclin-B3                                                     |
| 4   | PRKAR1B   | 2.30                            | 0.031   | cAMP-dependent protein kinase type I-beta regulatory subunit                      |
| 5   | AKT3      | 2.19                            | 0.011   | V-akt murine thymoma viral oncogene homolog 3                                     |
| 6   | JAK3      | 1.98                            | 0.013   | Tyrosine-protein kinase JAK3                                                      |
| 7   | CSF3R     | 1.66                            | 0.011   | Colony stimulating factor 3 receptor (granulocyte)                                |
| 8   | CD19      | 1.61                            | 0.009   | B-lymphocyte surface antigen B4                                                   |
| 9   | PIK3R5    | 1.28                            | 0.035   | Phosphatidylinositol 4,5-bisphosphate 3-kinase regulatory subunit                 |
| 10  | NTHL1     | 1.01                            | 0.049   | Bifunctional DNA N-glycosylase/DNA-(apurinic or apyrimidinic site) lyase          |
| 11  | PRKAR2B   | -1.04                           | 0.024   | cAMP-dependent protein kinase type II-beta regulatory subunit                     |
| 12  | FGF12     | -1.12                           | 0.032   | Fibroblast growth factor homologous factor 1                                      |
| 13  | PLA2G4A   | -1.20                           | 0.010   | Phospholipase A2, group IVA (cytosolic, calcium-dependent)                        |
| 14  | DNMT1     | -1.23                           | 0.033   | DNA (cytosine-5-)-methyltransferase 1                                             |
| 15  | PPP2R2C   | -1.32                           | 0.038   | Serine/threonine-protein phosphatase 2A 55 kDa regulatory subunit B gamma isoform |
| 16  | CDKN2D    | -1.36                           | 0.002   | Cyclin-dependent kinase inhibitor 2D (p19, inhibits CDK4)                         |
| 17  | CCND2     | -1.50                           | 0.036   | G1/S-specific cyclin-D2                                                           |
| 18  | FST       | -1.58                           | 0.009   | Activin-binding protein                                                           |
| 19  | FGFR3     | -1.65                           | 0.100   | Fibroblast growth factor receptor 3                                               |
| 20  | RELN      | -1.70                           | 0.029   | Reelin                                                                            |
| 21  | WNT5B     | -2.11                           | 0.015   | Wingless-type MMTV integration site family, member 5B                             |
| 22  | THBS1     | -2.62                           | 0.040   | Thrombospondin 1                                                                  |
| 23  | LEPR      | -2.67                           | 0.004   | Leptin receptor                                                                   |

**Table S5.** DEGs between F-36P and F-36P/AZA cells.

|    | Gene Name | Accession Number | Description                                                                                       |
|----|-----------|------------------|---------------------------------------------------------------------------------------------------|
| 1  | AKT3      | NM_181690.1      | V-akt murine thymoma viral oncogene homolog 3                                                     |
| 2  | ALKBH2    | NM_001001655.2   | Alpha-ketoglutarate-dependent dioxygenase alkB homolog 2                                          |
| 3  | AMER1     | NM_152424.3      | Wilms tumor gene on the X chromosome protein                                                      |
| 4  | ANGPT1    | NM_001146.3      | Angiopoietin 1                                                                                    |
| 5  | ASXL1     | NM_001164603.1   | Additional sex combs like transcriptional regulator 1                                             |
| 6  | AURKA     | NM_001323303.2   | Serine/threonine-protein kinase aurora-A                                                          |
| 7  | BCL2A1    | NM_004049.2      | Hemopoietic-specific early response protein                                                       |
| 8  | BMP2      | NM_001200.2      | Bone morphogenetic protein 2A                                                                     |
| 9  | BNIP3     | NM_004052.2      | BCL2/adenovirus E1B 19 kDa protein-interacting protein 3                                          |
| 10 | BRINP1    | NM_014618        | Bone morphogenetic protein/retinoic acid inducible neural-specific 1                              |
| 11 | CACNA2D3  | NM_018398.2      | Calcium channel, voltage-dependent, alpha 2/delta subunit 3                                       |
| 12 | CACNB4    | NM_001005747.2   | Voltage-dependent L-type calcium channel subunit beta-4                                           |
| 13 | CCNB3     | NM_033671.1      | G2/mitotic-specific cyclin-B3                                                                     |
| 14 | CDC14B    | NM_003671.3      | Dual specificity protein phosphatase CDC14B                                                       |
| 15 | CDKN1A    | NM_000389.2      | Cyclin-dependent kinase inhibitor 1A (p21, Cip1)                                                  |
| 16 | CFTR      | NM_000492        | Cystic fibrosis transmembrane conductance regulator (ATP-binding cassette sub-family C, member 7) |
| 17 | CIC       | NM_015125.3      | Capicua transcriptional repressor                                                                 |
| 18 | CR1       | NM_000573        | Complement component (3b/4b) receptor 1 (Knops blood group)                                       |
| 19 | CREB3L4   | NM_130898.2      | Cyclic AMP-responsive element-binding protein 3-like protein 4                                    |
| 20 | CSF3R     | NM_156038.2      | Colony stimulating factor 3 receptor (granulocyte)                                                |
| 21 | DDIT4     | NM_019058.2      | Protein regulated in development and DNA damage response 1                                        |
| 22 | DNMT3A    | NM_022552.3      | DNA (cytosine-5-)-methyltransferase 3 alpha                                                       |
| 23 | DNMT3B    | AF176228         | DNA (cytosine-5-)-methyltransferase 3 beta                                                        |
| 24 | DUSP1     | NM_004417        | Mitogen-activated protein kinase phosphatase 1                                                    |
| 25 | DUSP6     | NM_001946.2      | Mitogen-activated protein kinase phosphatase 3                                                    |
| 26 | E2F1      | NM_005225.1      | Retinoblastoma-associated protein 1                                                               |
| 27 | E2F5      | NM_001951.3      | E2F transcription factor 5, p130-binding                                                          |
| 28 | EPO       | NM_000799.2      | Erythropoietin                                                                                    |
| 29 | EPOR      | NM_000121.2      | Erythropoietin receptor                                                                           |
| 30 | ETNK2     | NM_018208        | Ethanolamine kinase-like protein                                                                  |
| 31 | ETS1      | NM_001162422     | V-ets avian erythroblastosis virus E26 oncogene homolog 1                                         |
| 32 | FAS       | NM_152876.1      | Tumor necrosis factor receptor superfamily member 6                                               |

|    |        |                |                                                                                    |
|----|--------|----------------|------------------------------------------------------------------------------------|
| 33 | FGF11  | NM_004112.2    | Fibroblast growth factor homologous factor 3                                       |
| 34 | FGFR1  | NM_015850.2    | Basic fibroblast growth factor receptor 1                                          |
| 35 | FOS    | NM_005252.2    | FBJ murine osteosarcoma viral oncogene homolog                                     |
| 36 | FZD7   | NM_003507.1    | Frizzled class receptor 7                                                          |
| 37 | GFI1   | NM_005263      | Growth factor independent 1 transcription repressor                                |
| 38 | GNA11  | NM_002067.1    | Guanine nucleotide binding protein (G protein), alpha 11 (Gq class)                |
| 39 | HDAC10 | NM_032019.5    | Histone deacetylase 10                                                             |
| 40 | HDAC4  | NM_006037.3    | Histone deacetylase 4                                                              |
| 41 | HMGAI  | NM_145904.1    | High mobility group protein HMG-I/HMG-Y                                            |
| 42 | HSPA2  | NM_021979.3    | Heat shock-related 70 kDa protein 2                                                |
| 43 | ID1    | NM_002165.2    | Inhibitor of DNA binding 1, dominant negative helix-loop-helix protein             |
| 44 | ID2    | NM_002166.4    | Inhibitor of DNA binding 2, dominant negative helix-loop-helix protein             |
| 45 | IFNA17 | NM_021268.2    | Interferon, alpha 17                                                               |
| 46 | IL11RA | NM_147162.1    | Interleukin-11 receptor subunit alpha                                              |
| 47 | IL12B  | NM_002187.2    | Cytotoxic lymphocyte maturation factor 40 kDa subunit                              |
| 48 | IL2RB  | NM_000878.2    | High affinity IL-2 receptor subunit beta                                           |
| 49 | IL3RA  | NM_002183.2    | Interleukin 3 receptor, alpha (low affinity)                                       |
| 50 | ITGA9  | NM_002207.2    | Integrin alpha-RLC                                                                 |
| 51 | JAK3   | NM_000215.2    | Tyrosine-protein kinase JAK3                                                       |
| 52 | KL     | AB005142.1     | Klotho                                                                             |
| 53 | LMX1B  | NM_002316      | LIM homeobox transcription factor 1, beta                                          |
| 54 | MAPK10 | NM_002753.2    | Stress-activated protein kinase JNK3                                               |
| 55 | MET    | NM_000245.2    | MET proto-oncogene, receptor tyrosine kinase                                       |
| 56 | MLF1   | NM_022443.3    | Myelodysplasia-myeloid leukemia factor 1                                           |
| 57 | MPL    | NM_005373.2    | MPL proto-oncogene, thrombopoietin receptor                                        |
| 58 | MYC    | NM_002467.3    | V-myc avian myelocytomatosis viral oncogene homolog                                |
| 59 | MYCN   | NM_005378.4    | V-myc avian myelocytomatosis viral oncogene neuroblastoma derived homolog          |
| 60 | NFKB1  | NM_003998.2    | Nuclear factor of kappa light polypeptide gene enhancer in B-cells 1               |
| 61 | NFKBIZ | NM_001005474.1 | Nuclear factor of kappa light polypeptide gene enhancer in B-cells inhibitor, zeta |
| 62 | NOTCH1 | NM_017617.3    | Translocation-associated notch protein TAN-1                                       |
| 63 | PDGFB  | NM_033016.2    | Platelet-derived growth factor beta polypeptide                                    |
| 64 | PIM1   | NM_002648.2    | Pim-1 proto-oncogene, serine/threonine kinase                                      |
| 65 | PITX2  | NM_000325.5    | RIEG bicoid-related homeobox transcription factor                                  |

|    |           |                |                                                                                               |
|----|-----------|----------------|-----------------------------------------------------------------------------------------------|
| 66 | PLK1      | NM_005030      | Serine/threonine-protein kinase PLK1                                                          |
| 67 | PRKAA2    | NM_006252.2    | 5'-AMP-activated protein kinase catalytic subunit alpha-2                                     |
| 68 | PRKAR1B   | NM_001164759.1 | cAMP-dependent protein kinase type I-beta regulatory subunit                                  |
| 69 | RPS6KA5   | NM_004755.2    | Nuclear mitogen- and stress-activated protein kinase 1                                        |
| 70 | RUNX1T1   | NM_004349.2    | Runt-related transcription factor 1                                                           |
| 71 | SERPINA5  | NM_000624      | Serpin peptidase inhibitor, clade A (alpha-1 antiproteinase, antitrypsin), member 5           |
| 72 | SHH       | NM_000193      | Shh unprocessed N-terminal signaling and C-terminal autoprocessing domains                    |
| 73 | SLC8A1    | NM_001112800.1 | Solute carrier family 8 (sodium/calcium exchanger), member 1                                  |
| 74 | SMC1B     | NM_148674.3    | Structural maintenance of chromosomes protein 1B                                              |
| 75 | SPP1      | NM_000582.2    | Secreted phosphoprotein 1                                                                     |
| 76 | TNFRSF10C | NM_003841.2    | Tumor necrosis factor receptor superfamily, member 10c, decoy without an intracellular domain |
| 77 | TP53      | NM_000546.2    | Cellular tumor antigen p53                                                                    |
| 78 | TUBB3     | NM_006086.3    | Tubulin, beta 3 class III                                                                     |
| 79 | WNT3      | NM_030753.3    | Wingless-type MMTV integration site family, member 3                                          |
| 80 | WNT5A     | NM_003392.3    | Wingless-type MMTV integration site family, member 5A                                         |

---



**Table S6.** Functional roles of module genes.

| No. | Gene symbol | Full name                                    | Function                                                                                                                                                                                                                                                                                                                                                                                                                                                                                                                                                                                                                                                                                                                                                                                                                                                                                                                                                                                                                                                                                                                                                                                                                                                                                                                                                                                                                                                                                                                                                                                                                                                                                                                                                                                                                                                                    |
|-----|-------------|----------------------------------------------|-----------------------------------------------------------------------------------------------------------------------------------------------------------------------------------------------------------------------------------------------------------------------------------------------------------------------------------------------------------------------------------------------------------------------------------------------------------------------------------------------------------------------------------------------------------------------------------------------------------------------------------------------------------------------------------------------------------------------------------------------------------------------------------------------------------------------------------------------------------------------------------------------------------------------------------------------------------------------------------------------------------------------------------------------------------------------------------------------------------------------------------------------------------------------------------------------------------------------------------------------------------------------------------------------------------------------------------------------------------------------------------------------------------------------------------------------------------------------------------------------------------------------------------------------------------------------------------------------------------------------------------------------------------------------------------------------------------------------------------------------------------------------------------------------------------------------------------------------------------------------------|
| 1   | WNT3        | Wnt Family Member 3                          | Wingless-type MMTV integration site family, member 3; Ligand for members of the frizzled family of seven transmembrane receptors. Wnt-3 and Wnt-3a play distinct roles in cell-cell signaling during morphogenesis of the developing neural tube (By similarity).                                                                                                                                                                                                                                                                                                                                                                                                                                                                                                                                                                                                                                                                                                                                                                                                                                                                                                                                                                                                                                                                                                                                                                                                                                                                                                                                                                                                                                                                                                                                                                                                           |
| 2   | SERPINA5    | Serpin Family A Member 5                     | Serpin peptidase inhibitor, clade A (alpha-1 antiproteinase, antitrypsin), member 5; Heparin-dependent serine protease inhibitor acting in body fluids and secretions. Inactivates serine proteases by binding irreversibly to their serine activation site. Involved in the regulation of intravascular and extravascular proteolytic activities. Plays hemostatic roles in the blood plasma. Acts as a procoagulant and proinflammatory factor by inhibiting the anticoagulant activated protein C factor as well as the generation of activated protein C factor by the thrombin/thrombomodulin complex. Acts as an anticoagulant factor by inhibiting blood coagulation factors like prothrombin, factor XI, factor Xa, plasma kallikrein and fibrinolytic enzymes such as tissue- and urinary- type plasminogen activators. In seminal plasma, inactivates several serine proteases implicated in the reproductive system. Inhibits the serpin acrosin; indirectly protects component of the male genital tract from being degraded by excessive released acrosin. Inhibits tissue- and urinary-type plasminogen activator, prostate-specific antigen and kallikrein activities; has a control on the sperm motility and fertilization. Inhibits the activated protein C-catalyzed degradation of SEMG1 and SEMG2; regulates the degradation of semenogelin during the process of transfer of spermatozoa from the male reproductive tract into the female tract. In urine, inhibits urinary-type plasminogen activator and kallikrein activities. Inactivates membrane-anchored serine proteases activities such as MPRSS7 and TMPRSS11E. Inhibits urinary-type plasminogen activator-dependent tumor cell invasion and metastasis. May also play a non-inhibitory role in seminal plasma and urine as a hydrophobic hormone carrier by its binding to retinoic acid. |
| 3   | HSPA2       | Heat Shock Protein Family A (Hsp70) Member 2 | Heat shock-related 70 kDa protein 2; Molecular chaperone implicated in a wide variety of cellular processes, including protection of the proteome from stress, folding and transport of newly synthesized polypeptides, activation of proteolysis of misfolded proteins and the formation and dissociation of protein complexes. Plays a pivotal role in the protein quality control system, ensuring the correct folding of proteins, the re-folding of misfolded proteins and controlling the targeting of proteins for subsequent degradation. This is achieved through cycles of ATP binding, ATP hydrolysis and ADP release, mediated by co-chaperones. The affinity for polypeptides is regulated by its nucleotide bound state. In the ATP-bound form, it has a low affinity for substrate proteins. However, upon hydrolysis of the ATP to ADP, it undergoes a conformational change that increases its affinity for substrate proteins. It goes through repeated cycles of ATP hydrolysis and nucleotide exchange, which permits cycles of substrate binding and release. Plays a role in spermatogenesis. In association with SHCBP1L may participate in the maintenance of spindle integrity during meiosis in male germ cells (By similarity); Heat shock 70kDa proteins                                                                                                                                                                                                                                                                                                                                                                                                                                                                                                                                                                                        |
| 4   | FAS         | Fas Cell Surface Death Receptor              | Tumor necrosis factor receptor superfamily member 6; Receptor for TNFSF6/FASLG. The adapter molecule FADD recruits caspase-8 to the activated receptor. The resulting death- inducing                                                                                                                                                                                                                                                                                                                                                                                                                                                                                                                                                                                                                                                                                                                                                                                                                                                                                                                                                                                                                                                                                                                                                                                                                                                                                                                                                                                                                                                                                                                                                                                                                                                                                       |

|    |           |                                                        |                                                                                                                                                                                                                                                                                                                                                                                                                                                                                                                                                                                                                                                                                                                                                                                                                                                                                                                                                                                                                                                                                                                                                                                                                                                                                                                                                                                                                                                                                                                              |
|----|-----------|--------------------------------------------------------|------------------------------------------------------------------------------------------------------------------------------------------------------------------------------------------------------------------------------------------------------------------------------------------------------------------------------------------------------------------------------------------------------------------------------------------------------------------------------------------------------------------------------------------------------------------------------------------------------------------------------------------------------------------------------------------------------------------------------------------------------------------------------------------------------------------------------------------------------------------------------------------------------------------------------------------------------------------------------------------------------------------------------------------------------------------------------------------------------------------------------------------------------------------------------------------------------------------------------------------------------------------------------------------------------------------------------------------------------------------------------------------------------------------------------------------------------------------------------------------------------------------------------|
|    |           |                                                        | signaling complex (DISC) performs caspase-8 proteolytic activation which initiates the subsequent cascade of caspases (aspartate-specific cysteine proteases) mediating apoptosis. FAS-mediated apoptosis may have a role in the induction of peripheral tolerance, in the antigen-stimulated suicide of mature T-cells, or both. The secreted isoforms 2 to 6 block apoptosis (in vitro); CD molecules                                                                                                                                                                                                                                                                                                                                                                                                                                                                                                                                                                                                                                                                                                                                                                                                                                                                                                                                                                                                                                                                                                                      |
| 5  | CACNB4    | Calcium Voltage-Gated Channel Auxiliary Subunit Beta 4 | Voltage-dependent L-type calcium channel subunit beta-4; The beta subunit of voltage-dependent calcium channels contributes to the function of the calcium channel by increasing peak calcium current, shifting the voltage dependencies of activation and inactivation, modulating G protein inhibition and controlling the alpha-1 subunit membrane targeting.                                                                                                                                                                                                                                                                                                                                                                                                                                                                                                                                                                                                                                                                                                                                                                                                                                                                                                                                                                                                                                                                                                                                                             |
| 6  | HDAC4     | Histone Deacetylase 4                                  | Histone deacetylase 4; Responsible for the deacetylation of lysine residues on the N-terminal part of the core histones (H2A, H2B, H3 and H4). Histone deacetylation gives a tag for epigenetic repression and plays an important role in transcriptional regulation, cell cycle progression and developmental events. Histone deacetylases act via the formation of large multiprotein complexes. Involved in muscle maturation via its interaction with the myocyte enhancer factors such as MEF2A, MEF2C and MEF2D. Involved in the MTA1-mediated epigenetic regulation of ESR1 expression in breast cancer. Deacetylates HSPA1A and HSPA1B at 'Lys-77' leading to their preferential binding to co-chaperone STUB1.                                                                                                                                                                                                                                                                                                                                                                                                                                                                                                                                                                                                                                                                                                                                                                                                      |
| 7  | TNFRSF10C | TNF Receptor Superfamily Member 10c                    | Tumor necrosis factor receptor superfamily, member 10c, decoy without an intracellular domain; Receptor for the cytotoxic ligand TRAIL. Lacks a cytoplasmic death domain and hence is not capable of inducing apoptosis. May protect cells against TRAIL mediated apoptosis by competing with TRAIL-R1 and R2 for binding to the ligand; CD molecules                                                                                                                                                                                                                                                                                                                                                                                                                                                                                                                                                                                                                                                                                                                                                                                                                                                                                                                                                                                                                                                                                                                                                                        |
| 8  | ITGA9     | Integrin Subunit Alpha 9                               | Integrin alpha-RLC; Integrin alpha-9/beta-1 (ITGA9:ITGB1) is a receptor for VCAM1, cytactin and osteopontin. It recognizes the sequence A-E- I-D-G-I-E-L in cytactin.                                                                                                                                                                                                                                                                                                                                                                                                                                                                                                                                                                                                                                                                                                                                                                                                                                                                                                                                                                                                                                                                                                                                                                                                                                                                                                                                                        |
| 9  | ANGPT1    | Angiopoietin 1                                         | Angiopoietin 1; Binds and activates TEK/TIE2 receptor by inducing its dimerization and tyrosine phosphorylation. Plays an important role in the regulation of angiogenesis, endothelial cell survival, proliferation, migration, adhesion and cell spreading, reorganization of the actin cytoskeleton, but also maintenance of vascular quiescence. Required for normal angiogenesis and heart development during embryogenesis. After birth, activates or inhibits angiogenesis, depending on the context. Inhibits angiogenesis and promotes vascular stability in quiescent vessels, where endothelial cells have tight contacts. In quiescent vessels, ANGPT1 oligomers recruit TEK to cell-cell contacts, forming complexes with TEK molecules from adjoining cells, and this leads to preferential activation of phosphatidylinositol 3-kinase and the AKT1 signaling cascades. In migrating endothelial cells that lack cell-cell adhesions, ANGPT1 recruits TEK to contacts with the extracellular matrix, leading to the formation of focal adhesion complexes, activation of PTK2/FAK and of the downstream kinases MAPK1/ERK2 and MAPK3/ERK1, and ultimately to the stimulation of sprouting angiogenesis. Mediates blood vessel maturation/stability. Implicated in endothelial developmental processes later and distinct from that of VEGF. Appears to play a crucial role in mediating reciprocal interactions between the endothelium and surrounding matrix and mesenchyme; Fibrinogen C domain containing |
| 10 | CFTR      | CF Transmembrane Conductance Regulator                 | Cystic fibrosis transmembrane conductance regulator (ATP-binding cassette sub-family C, member 7); Epithelial ion channel that plays an important role in the regulation of epithelial ion and water transport and fluid homeostasis. Mediates the transport of chloride ions across the cell membrane. Channel activity is                                                                                                                                                                                                                                                                                                                                                                                                                                                                                                                                                                                                                                                                                                                                                                                                                                                                                                                                                                                                                                                                                                                                                                                                  |

|    |       |                                                       |                                                                                                                                                                                                                                                                                                                                                                                                                                                                                                                                                                                                                                                                                                                                                                                                                                                                                                                                                                                                                                                                                                                                                                                                          |
|----|-------|-------------------------------------------------------|----------------------------------------------------------------------------------------------------------------------------------------------------------------------------------------------------------------------------------------------------------------------------------------------------------------------------------------------------------------------------------------------------------------------------------------------------------------------------------------------------------------------------------------------------------------------------------------------------------------------------------------------------------------------------------------------------------------------------------------------------------------------------------------------------------------------------------------------------------------------------------------------------------------------------------------------------------------------------------------------------------------------------------------------------------------------------------------------------------------------------------------------------------------------------------------------------------|
|    |       |                                                       | coupled to ATP hydrolysis. The ion channel is also permeable to HCO <sub>3</sub> <sup>-</sup> ; selectivity depends on the extracellular chloride concentration. Exerts its function also by modulating the activity of other ion channels and transporters. Plays an important role in airway fluid homeostasis. Contributes to the regulation of the pH and the ion content of the airway surface fluid layer and thereby plays an important role in defense against pathogens. Modulates the activity of the epithelial sodium channel (ENaC) complex, in part by regulating the cell surface expression of the ENaC complex. Inhibits the activity of the ENaC channel containing subunits SCNN1A, SCNN1B and SCNN1G. Inhibits the activity of the ENaC channel containing subunits SCNN1D, SCNN1B and SCNN1G, but not of the ENaC channel containing subunits SCNN1A, SCNN1B and SCNN1G. May regulate bicarbonate secretion and salvage in epithelial cells by regulating the transporter SLC4A7. Can inhibit the chloride channel activity of ANO1. Plays a role in the chloride and bicarbonate homeostasis during sperm epididymal maturation and capacitation; ATP binding cassette subfamily C |
| 11 | TUBB3 | Tubulin Beta 3 Class III                              | Tubulin, beta 3 class III; Tubulin is the major constituent of microtubules. It binds two moles of GTP, one at an exchangeable site on the beta chain and one at a non-exchangeable site on the alpha chain. TUBB3 plays a critical role in proper axon guidance and maintenance; Belongs to the tubulin family.                                                                                                                                                                                                                                                                                                                                                                                                                                                                                                                                                                                                                                                                                                                                                                                                                                                                                         |
| 12 | GFI1  | Growth Factor Independent 1 Transcriptional Repressor | Growth factor independent 1 transcription repressor; Transcription repressor essential for hematopoiesis. Functions in a cell-context and development-specific manner. Binds to 5'-TAAATCAC[AT]GCA-3' in the promoter region of a large number of genes. Component of several complexes, including the EHMT2-GFI1-HDAC1, AJUBA-GFI1-HDAC1 and RCOR-GFI-KDM1A-HDAC complexes, that suppress, via histone deacetylase (HDAC) recruitment, a number of genes implicated in multilineage blood cell development. Regulates neutrophil differentiation, promotes proliferation of lymphoid cells, and is required for granulocyte development. Mediates, together with U2AF1L4, the alternative splicing of CD45 and controls T-cell receptor signaling. Regulates the endotoxin-mediated Toll-like receptor (TLR) inflammatory response by antagonizing RELA. Cooperates with CBFA2T2 to regulate ITGB1-dependent neurite growth. Controls cell-cycle progression by repressing CDKN1A/p21 transcription in response to TGFβ1 via recruitment of GFI1 by ZBTB17 to the CDKN1A/p21 and CDKN1B promoters. Required for the maintenance of inner ear hair cells; SNAG transcriptional repressors                |
| 13 | CR1   | Complement C3b/C4b Receptor 1 (Knops Blood Group)     | Complement component (3b/4b) receptor 1 (Knops blood group); Mediates cellular binding of particles and immune complexes that have activated complement; Blood group antigens                                                                                                                                                                                                                                                                                                                                                                                                                                                                                                                                                                                                                                                                                                                                                                                                                                                                                                                                                                                                                            |
| 14 | KL    | Klotho                                                | Klotho; May have weak glycosidase activity towards glucuronylated steroids. However, it lacks essential active site Glu residues at positions 239 and 872, suggesting it may be inactive as a glycosidase in vivo. May be involved in the regulation of calcium and phosphorus homeostasis by inhibiting the synthesis of active vitamin D (By similarity). Essential factor for the specific interaction between FGF23 and FGFR1 (By similarity); Belongs to the glycosyl hydrolase 1 family. Klotho subfamily.                                                                                                                                                                                                                                                                                                                                                                                                                                                                                                                                                                                                                                                                                         |
| 15 | CCNB3 | Cyclin B3                                             | G2/mitotic-specific cyclin-B3; Cyclins are positive regulatory subunits of the cyclin-dependent kinases (CDKs), and thereby play an essential role in the control of the cell cycle, notably via their destruction during cell division. Its tissue specificity suggest that it may be required during early meiotic prophase I.                                                                                                                                                                                                                                                                                                                                                                                                                                                                                                                                                                                                                                                                                                                                                                                                                                                                         |

|    |        |                                               |                                                                                                                                                                                                                                                                                                                                                                                                                                                                                                                                                                                                                                                                                                                                                                                                                         |
|----|--------|-----------------------------------------------|-------------------------------------------------------------------------------------------------------------------------------------------------------------------------------------------------------------------------------------------------------------------------------------------------------------------------------------------------------------------------------------------------------------------------------------------------------------------------------------------------------------------------------------------------------------------------------------------------------------------------------------------------------------------------------------------------------------------------------------------------------------------------------------------------------------------------|
| 16 | IL12B  | Interleukin 12B                               | Cytotoxic lymphocyte maturation factor 40 kDa subunit; Cytokine that can act as a growth factor for activated T and NK cells, enhance the lytic activity of NK/lymphokine- activated killer cells, and stimulate the production of IFN-gamma by resting PBMC; Belongs to the type I cytokine receptor family. Type 3 subfamily.                                                                                                                                                                                                                                                                                                                                                                                                                                                                                         |
| 17 | SLC8A1 | Solute Carrier Family 8 Member A1             | Solute carrier family 8 (sodium/calcium exchanger), member 1; Mediates the exchange of one Ca(2+) ion against three to four Na(+) ions across the cell membrane, and thereby contributes to the regulation of cytoplasmic Ca(2+) levels and Ca(2+)- dependent cellular processes. Contributes to Ca(2+) transport during excitation-contraction coupling in muscle. In a first phase, voltage-gated channels mediate the rapid increase of cytoplasmic Ca(2+) levels due to release of Ca(2+) stores from the endoplasmic reticulum. SLC8A1 mediates the export of Ca(2+) from the cell during the next phase, so that cytoplasmic Ca(2+) levels rapidly return to baseline. Required for normal embryonic heart development and the onset of heart contractions; Solute carriers                                       |
| 18 | MLF1   | Myeloid Leukemia Factor 1                     | Myelodysplasia-myeloid leukemia factor 1; Involved in lineage commitment of primary hemopoietic progenitors by restricting erythroid formation and enhancing myeloid formation. Interferes with erythropoietin-induced erythroid terminal differentiation by preventing cells from exiting the cell cycle through suppression of CDKN1B/p27Kip1 levels. Suppresses RFW2/COP1 activity via CSN3 which activates p53 and induces cell cycle arrest. Binds DNA and affects the expression of a number of genes so may function as a transcription factor in the nucleus; Belongs to the MLF family.                                                                                                                                                                                                                        |
| 19 | BCL2A1 | BCL2 Related Protein A1                       | Hemopoietic-specific early response protein; Retards apoptosis induced by IL-3 deprivation. May function in the response of hemopoietic cells to external signals and in maintaining endothelial survival during infection (By similarity). Can inhibit apoptosis induced by serum starvation in the mammary epithelial cell line HC11 (By similarity); BCL2 family                                                                                                                                                                                                                                                                                                                                                                                                                                                     |
| 20 | AMER1  | APC Membrane Recruitment Protein 1            | Wilms tumor gene on the X chromosome protein; Regulator of the canonical Wnt signaling pathway. Acts by specifically binding phosphatidylinositol 4,5-bisphosphate (PtdIns(4,5)P2), translocating to the cell membrane and interacting with key regulators of the canonical Wnt signaling pathway, such as components of the beta-catenin destruction complex. Acts both as a positive and negative regulator of the Wnt signaling pathway, depending on the context: acts as a positive regulator by promoting LRP6 phosphorylation. Also acts as a negative regulator by acting as a scaffold protein for the beta- catenin destruction complex and promoting stabilization of Axin at the cell membrane. Promotes CTNNB1 ubiquitination and degradation. Involved in kidney development; Belongs to the Amer family. |
| 21 | BRINP1 | BMP/Retinoic Acid Inducible Neural Specific 1 | Bone morphogenetic protein/retinoic acid inducible neural-specific 1; Inhibits cell proliferation by negative regulation of the G1/S transition. Mediates cell death which is not of the classical apoptotic type and regulates expression of components of the plasminogen pathway; Belongs to the BRINP family.                                                                                                                                                                                                                                                                                                                                                                                                                                                                                                       |
| 22 | PITX2  | Paired Like Homeodomain 2                     | RIEG bicoid-related homeobox transcription factor; Controls cell proliferation in a tissue-specific manner and is involved in morphogenesis. During embryonic development, exerts a role in the expansion of muscle progenitors. May play a role in the proper localization of asymmetric organs such as the heart and stomach. Isoform PTX2C is involved in left-right asymmetry the developing embryo (By similarity); Belongs to the paired homeobox family. Bicoid subfamily.                                                                                                                                                                                                                                                                                                                                       |
| 23 | E2F5   | E2F Transcription Factor 5                    | E2F transcription factor 5, p130-binding; Transcriptional activator that binds to E2F sites, these sites are present in the promoter of many genes whose products are involved in cell proliferation. May                                                                                                                                                                                                                                                                                                                                                                                                                                                                                                                                                                                                               |

|    |       |                                          |                                                                                                                                                                                                                                                                                                                                                                                                                                                                                                                                                                                                                                                 |
|----|-------|------------------------------------------|-------------------------------------------------------------------------------------------------------------------------------------------------------------------------------------------------------------------------------------------------------------------------------------------------------------------------------------------------------------------------------------------------------------------------------------------------------------------------------------------------------------------------------------------------------------------------------------------------------------------------------------------------|
|    |       |                                          | mediate growth factor- initiated signal transduction. It is likely involved in the early responses of resting cells to growth factor stimulation. Specifically required for multiciliate cell differentiation: together with MCIDAS and E2F5, binds and activate genes required for centriole biogenesis; Belongs to the E2F/DP family.                                                                                                                                                                                                                                                                                                         |
| 24 | PDGFB | Platelet Derived Growth Factor Subunit B | Platelet-derived growth factor beta polypeptide; Growth factor that plays an essential role in the regulation of embryonic development, cell proliferation, cell migration, survival and chemotaxis. Potent mitogen for cells of mesenchymal origin. Required for normal proliferation and recruitment of pericytes and vascular smooth muscle cells in the central nervous system, skin, lung, heart and placenta. Required for normal blood vessel development, and for normal development of kidney glomeruli. Plays an important role in wound healing. Signaling is modulated by the formation of heterodimers with PDGFA (By similarity). |
